# Supplementary material
Source: PubMed Central journal article supplement (PMC5709125)
Supplement: 2017_166678-Disclosures_and_Contributions.pdf [file 2017_166678-Disclosures_and_Contributions.pdf]

Haematologica  
HAEMATOL/2017/166678  
Version 3

Self-reverting mutations partially correct the blood phenotype in a  
Diamond Blackfan Anemia patient

Parvathy Venugopal, Sarah Moore, David M Lawrence, Ameer J George, Ross D Hannan, Sarah CE Bray, Luen Bik To, Richard J D'Andrea, Jinghua Feng, Amanda Tirimacco, Alexandra L Yeoman, Chun Chun Young, Miriam Fine, Andreas W Schreiber, Christopher N Hahn, Christopher Barnett, Ben Saxon, and Hamish S Scott

Disclosures: Conflict-of-interest disclosure: The authors declare no competing financial interests.

Contributions: PV, CNH, BS and HSS wrote the manuscript. CNH, RDH, LBT, RDA and HSS planned experiments. PV, AG, AT, AY, CCY and SCEB performed assays. PV, SM, DML, JF, AT, AWS, CNH carried out different aspects of data analysis. MF, CB and BS contributed to clinical aspects of data analysis. All authors critically reviewed and approved the manuscript.
